# Supplementary material for: The association between trainee demographic factors and self-reported experience: Analysis of General Medical Council National Training Survey 2014 and 2015 data
Source: PubMed Central journal article supplement — JRSM Open. 2016 Mar 3;7(4):2054270416632705. doi: 10.1177/2054270416632705 (PMC4821398; doi:10.1177/2054270416632705), 2016-03-03
Supplement: Supplementary_Table_1.pdf [file Supplementary_Table_1.pdf]

| Educational Supervision                           | Coef.      | P     | [95% Conf. | Interval]  |
|---------------------------------------------------|------------|-------|------------|------------|
| NTS Year                                          |            |       |            |            |
| 2014                                              | 0.0254741  | 0.097 | -0.0046785 | 0.0556266  |
| Sex                                               |            |       |            |            |
| Man                                               | 0.1690867  | 0     | 0.1330393  | 0.2051341  |
| Ethnicity                                         |            |       |            |            |
| BME                                               | 0.1558487  | 0     | 0.1178456  | 0.1938518  |
| Unspecified                                       | -0.3041408 | 0     | -0.376573  | -0.2317085 |
| Country of qualification                          |            |       |            |            |
| EEA                                               | -0.1067889 | 0.045 | -0.2109383 | -0.0026396 |
| Other country                                     | 0.0378311  | 0.197 | -0.0197643 | 0.0954264  |
| Grade                                             |            |       |            |            |
| Foundation                                        | -0.0512872 | 0.042 | -0.1007912 | -0.0017832 |
| Higher ST4+                                       | -0.127869  | 0     | -0.1847857 | -0.0709523 |
| Deanery                                           |            |       |            |            |
| Defence Postgraduate Medical Deanery              | 0.0805011  | 0.496 | -0.1522086 | 0.3132108  |
| East Midlands Healthcare Workforce Deanery        | 0.0575749  | 0.311 | -0.0540638 | 0.1692137  |
| East of England Multi-Professional Deanery        | 0.0840834  | 0.238 | -0.0560315 | 0.2241982  |
| Kent, Surrey and Sussex Deanery                   | 0.0917723  | 0.117 | -0.0233    | 0.2068447  |
| Mersey Deanery                                    | 0.3126693  | 0     | 0.1817664  | 0.4435721  |
| NHS Education for Scotland (East Region)          | 0.3732445  | 0     | 0.2236132  | 0.5228759  |
| NHS Education for Scotland (North Region)         | 0.3028635  | 0.001 | 0.1197718  | 0.4859552  |
| NHS Education for Scotland (South-East Region)    | 0.1988537  | 0.036 | 0.0133265  | 0.3843809  |
| NHS Education for Scotland (West Region)          | 0.2039912  | 0.004 | 0.0670571  | 0.3409253  |
| NHS West Midlands Workforce Deanery               | 0.3068365  | 0     | 0.1839092  | 0.4297638  |
| North Western Deanery                             | 0.368391   | 0     | 0.2182909  | 0.5184912  |
| Northern Deanery                                  | 0.4481482  | 0     | 0.343711   | 0.5525855  |
| Northern Ireland Medical & Dental Training Agency | 0.4745431  | 0     | 0.383687   | 0.5653993  |
| Oxford Deanery                                    | 0.0754632  | 0.255 | -0.0547263 | 0.2056527  |
| Pharmaceutical Medicine Virtual Deanery           | 0.0845594  | 0.077 | -0.0091672 | 0.178286   |
| Severn Deanery                                    | 0.0920857  | 0.162 | -0.0372316 | 0.2214031  |
| South West Peninsula Deanery                      | 0.1928828  | 0.011 | 0.0446964  | 0.3410692  |
| Wales Deanery                                     | 0.1450961  | 0.018 | 0.0251068  | 0.2650854  |
| Wessex Deanery                                    | 0.3046493  | 0     | 0.1588714  | 0.4504272  |
| Yorkshire and the Humber Postgraduate Deanery     | 0.2233583  | 0     | 0.1211785  | 0.325538   |
| Specialty                                         |            |       |            |            |
| Anaesthetics Posts                                | 0.2791116  | 0     | 0.196308   | 0.3619152  |
| Emergency Medicine Posts                          | 0.1378816  | 0.001 | 0.0560663  | 0.2196969  |
| General Practice Posts                            | 0.755742   | 0     | 0.6396622  | 0.8718219  |
| Obstetrics and Gynaecology Posts                  | 0.2124579  | 0     | 0.1397907  | 0.2851251  |
| Occupational Medicine Posts                       | -0.8723879 | 0.032 | -1.668049  | -0.076727  |
| Ophthalmology Posts                               | 0.1861265  | 0.05  | -0.000388  | 0.372641   |
| Paediatrics and Child Health Posts                | 0.1919942  | 0     | 0.1020699  | 0.2819185  |
| Pathology Posts                                   | 0.1143693  | 0.135 | -0.035777  | 0.2645156  |
| Psychiatry Posts                                  | -0.0380565 | 0.729 | -0.2546241 | 0.1785111  |
| Public Health Posts                               | -0.0857827 | 0.437 | -0.3027894 | 0.131224   |
| Radiology Posts                                   | 0.3108748  | 0     | 0.1853458  | 0.4364038  |
| Surgery Posts                                     | 0.0086252  | 0.776 | -0.0509258 | 0.0681761  |
