# Supplementary material for: The association between trainee demographic factors and self-reported experience: Analysis of General Medical Council National Training Survey 2014 and 2015 data
Source: PubMed Central journal article supplement — JRSM Open. 2016 Mar 3;7(4):2054270416632705. doi: 10.1177/2054270416632705 (PMC4821398; doi:10.1177/2054270416632705), 2016-03-03
Supplement: Supplementary_Table_2.pdf [file Supplementary_Table_2.pdf]

| Access to Educational Resources                   | Coef.     | P     | [95% Conf. | Interval] |
|---------------------------------------------------|-----------|-------|------------|-----------|
| NTS Year                                          |           |       |            |           |
| 2014                                              | -0.056146 | 0     | -0.077626  | -0.034666 |
| Sex                                               |           |       |            |           |
| Man                                               | 0.1617093 | 0     | 0.1327423  | 0.1906762 |
| Ethnicity                                         |           |       |            |           |
| BME                                               | -0.069112 | 0     | -0.099496  | -0.038727 |
| Unspecified                                       | -0.546376 | 0     | -0.607082  | -0.48567  |
| Country of qualification                          |           |       |            |           |
| EEA                                               | 0.1187705 | 0.026 | 0.0143299  | 0.2232111 |
| Other country                                     | 0.1825382 | 0     | 0.1345239  | 0.2305525 |
| Grade                                             |           |       |            |           |
| Foundation                                        | -0.147893 | 0     | -0.213087  | -0.082698 |
| Higher ST4+                                       | 0.2206317 | 0     | 0.1400495  | 0.3012138 |
| Deanery                                           |           |       |            |           |
| Defence Postgraduate Medical Deanery              | 0.1510788 | 0.039 | 0.0077942  | 0.2943634 |
| East Midlands Healthcare Workforce Deanery        | -0.116384 | 0.004 | -0.196041  | -0.036727 |
| East of England Multi-Professional Deanery        | 0.0082254 | 0.894 | -0.113418  | 0.1298689 |
| Kent, Surrey and Sussex Deanery                   | 0.1788705 | 0     | 0.0997059  | 0.2580351 |
| Mersey Deanery                                    | 0.1987725 | 0     | 0.1256662  | 0.2718788 |
| NHS Education for Scotland (East Region)          | 0.0947489 | 0.273 | -0.075114  | 0.264612  |
| NHS Education for Scotland (North Region)         | -0.011979 | 0.937 | -0.309622  | 0.2856647 |
| NHS Education for Scotland (South-East Region)    | 0.1168051 | 0.099 | -0.022295  | 0.255905  |
| NHS Education for Scotland (West Region)          | 0.2016801 | 0.024 | 0.0272449  | 0.3761154 |
| NHS West Midlands Workforce Deanery               | 0.23647   | 0.002 | 0.086305   | 0.386635  |
| North Western Deanery                             | 0.1626357 | 0.02  | 0.0254972  | 0.2997743 |
| Northern Deanery                                  | 0.2749402 | 0     | 0.1971693  | 0.3527111 |
| Northern Ireland Medical & Dental Training Agency | 0.086326  | 0.172 | -0.037705  | 0.2103574 |
| Oxford Deanery                                    | 0.206767  | 0.002 | 0.0767252  | 0.3368089 |
| Pharmaceutical Medicine Virtual Deanery           | 1.356622  | 0     | 1.265775   | 1.44747   |
| Severn Deanery                                    | 0.1961779 | 0     | 0.0933427  | 0.2990131 |
| South West Peninsula Deanery                      | 0.3973376 | 0     | 0.2395606  | 0.5551146 |
| Wales Deanery                                     | 0.4760636 | 0     | 0.3560205  | 0.5961068 |
| Wessex Deanery                                    | 0.1567118 | 0.031 | 0.014497   | 0.2989266 |
| Yorkshire and the Humber Postgraduate Deanery     | -0.026142 | 0.646 | -0.138022  | 0.0857381 |
| Specialty                                         |           |       |            |           |
| Anaesthetics Posts                                | 0.4619325 | 0     | 0.3670304  | 0.5568346 |
| Emergency Medicine Posts                          | 0.1346351 | 0.001 | 0.0546951  | 0.2145751 |
| General Practice Posts                            | 1.263998  | 0     | 1.121806   | 1.406191  |
| Obstetrics and Gynaecology Posts                  | 0.0928795 | 0.008 | 0.0239739  | 0.1617851 |
| Occupational Medicine Posts                       | 0.1426105 | 0.481 | -0.255526  | 0.5407472 |
| Ophthalmology Posts                               | 0.8118301 | 0     | 0.6039504  | 1.01971   |
| Paediatrics and Child Health Posts                | 0.2218151 | 0     | 0.1508865  | 0.2927437 |
| Pathology Posts                                   | 0.9570623 | 0     | 0.7987684  | 1.115356  |
| Psychiatry Posts                                  | 0.5266621 | 0     | 0.4193882  | 0.6339361 |
| Public Health Posts                               | 1.437418  | 0     | 1.068594   | 1.806242  |
| Radiology Posts                                   | 0.6958757 | 0     | 0.4989442  | 0.8928073 |
| Surgery Posts                                     | -0.041235 | 0.294 | -0.118564  | 0.0360939 |
